1 **Prevention of SARS-CoV-2 airborne transmission in a workplace based on CO<sub>2</sub>**  
2 **sensor network**

3  
4 Shinji Yokogawa <sup>1,2,3)</sup>, Yo Ishigaki <sup>2)\*</sup>, Hiroko Kitamura <sup>4)</sup>, Akira Saito <sup>5)</sup>, Yuto Kawauchi  
5 <sup>2)</sup>, and Taisei Hiraide <sup>3)</sup>

6  
7 **Affiliations:**

- 8 1) Info-powered Energy System Research Center (i-PERC), University of Electro-  
9 communications, Chofu, Tokyo, Japan  
10 2) Graduate School of Informatics and Engineering, University of Electro-  
11 communications, Chofu, Tokyo, Japan  
12 3) School of Informatics and Engineering, University of Electro-communications,  
13 Chofu, Tokyo, Japan  
14 4) Occupational Health Training Center, University of Occupational and  
15 Environmental Health, Fukuoka, Japan  
16 5) Miyagi Anti-Tuberculosis Association, Miyagi, Japan

17  
18 **\*Corresponding author:**

19 Yo Ishigaki, [ishigaki@uec.ac.jp](mailto:ishigaki@uec.ac.jp), University of Electro-Communications, 1-5-1, Chofu,  
20 182-8585 Tokyo, Japan

21  
22 **Acknowledgments**

23 This work was supported by JSPS KAKENHI Grant No. 21K19820.  
24

25 **Abstract:** We measured the compartmental air change per hour (ACH) using a CO<sub>2</sub>  
26 sensor network in an office space where a cluster of COVID-19 infections attributed to  
27 aerosol transmission occurred. Generalized linear mixed models and dynamic time  
28 warping were used for a time series data analysis, and the results indicated that the  
29 ventilation conditions were poor at the time of the cluster outbreak, and that the low  
30 ACH in the room likely contributed to the outbreak. In addition, the adverse effects of  
31 inappropriate partitions and the effectiveness of ventilation improvements were

NOTE: This preprint reports new research that has not been certified by peer review and should not be used to guide clinical practice.

32 investigated in detail. ACH of less than 2 /h was considered a main contributor for the  
33 formation of the COVID-19 cluster in the studied facility.

34

35 **Practical Implications:** A systematic method for measuring and evaluating indoor  
36 ventilation to prevent the spread of infectious diseases caused by aerosols is  
37 presented. Ventilation bias caused by ventilation pathways and inappropriate use of  
38 plastic sheeting can be detected by a CO<sub>2</sub> sensor network and time series data  
39 analysis. Estimated ventilation rate will be a good index to suppress the formation of  
40 the COVID-19 cluster.

41

42 **Keywords:** SARS-CoV-2; air circulation; CO<sub>2</sub> sensor network; aerosol transmission;  
43 containment measures; building ventilation

44

## 45 **Introduction**

46 Controlling the spread of COVID-19 has become a priority worldwide. After case  
47 reports in December 2019, social distancing has been widely adopted as a  
48 containment strategy. The adoption of this social lifestyle has reaffirmed the importance  
49 of direct human connections and face-to-face interaction. Therefore, it is essential to  
50 control the risks and ensure safety in educational, public, and workplaces, which

51 requires efforts of managers, supervisors, administrators, and all other stakeholders.

52 To reduce the risk of COVID-19 transmission, measures against all three routes  
53 of infection (contact, droplet, and aerosol) and to reduce the probability of infection  
54 through multiple defenses, social distance, mask, vaccine, etc., are required. However,  
55 compared to contact and droplet transmission, which can be prevented by social  
56 distancing and the use of masks, aerosol transmission is difficult to visually recognize,  
57 and the effectiveness of respective countermeasures has not been confirmed.  
58 Accordingly, mass transmissions of COVID-19 have been reported in poorly ventilated  
59 areas.<sup>1</sup> In addition, the inappropriate use of plastic sheeting for preventing droplet  
60 infection has caused clusters of infectious diseases and threatened workplace safety.<sup>2</sup>

61 To avoid such risks, the use of CO<sub>2</sub> sensors to control indoor air quality has  
62 attracted significant attention.<sup>3-7</sup> The measurement of indoor CO<sub>2</sub> concentration  
63 (referring to exhaled air) is considered an effective method for indirect risk  
64 management to ensure that exhaled aerosol particles containing SARS-CoV-2 do not  
65 remain indoors. Therefore, these devices have been widely installed as a safety  
66 measure in places where people gather, such as restaurants, stores, classrooms, and  
67 offices. The guideline for its operation considers a provisional control value of 800-  
68 1000 ppm set by government agencies of each countries as the maximum CO<sub>2</sub>  
69 concentration.<sup>8</sup> Under pandemic conditions, the Centers for Disease Control and

70 Prevention has indicated that the CO<sub>2</sub> concentration should be maintained below 800  
71 ppm,<sup>9</sup> which has been considered a good safety indicator.

72 However, as CO<sub>2</sub> concentration is not a direct risk indicator and there is no direct  
73 epidemiological relationship between CO<sub>2</sub> concentration and COVID-19 transmission,  
74 the effectiveness of this method should be verified to define appropriate control  
75 measures so as to improve the transmission risk and the safety of workplaces. In the  
76 manufacturing industry, quality assurance focuses on processes to ensure quality, and  
77 the proper control of a process is an indicator of product quality.<sup>10</sup> Similarly, the risk  
78 management of COVID-19 requires the management and control of the environment  
79 (i.e., ventilation), rather than of the CO<sub>2</sub> concentration itself.

80 The ventilation in a building room can generally be calculated by dividing the  
81 building volume by the ventilation volume of the installed ventilation measures.  
82 However, years after the construction of a building, the layout of rooms might change  
83 or the performance of the ventilation system can be degraded, so the capacity of the  
84 ventilation system will not be maintained as calculated. To overcome this issue, the  
85 ventilation in a target room can be evaluated and quantitatively assessed based on the  
86 CO<sub>2</sub> concentration behavior monitored by CO<sub>2</sub> sensors. In addition, the ventilation  
87 performance is not uniform for floors with large areas and complex layouts.<sup>2,11</sup>  
88 Therefore, a systematic evaluation should be conducted by analyzing the time series

89 of data from sensors arranged in a network, and these results can be used to improve  
90 ventilation and reduce transmission risks.

91 In this study, we used a CO<sub>2</sub> sensor network and conducted a tracer gas  
92 experiment to evaluate the complex ventilation conditions in a business site in Japan,  
93 where a cluster of COVID-19 infections occurred. In 2021, 14 infections occurred  
94 among 30 workers who spent a short time in a large work preparation room with an  
95 area of 880 m<sup>2</sup> and ceiling height of 3 m. The room was divided by four partitions, and  
96 only a small number of entrances and exits served as ventilation routes. The distance  
97 between the workers was greater than 2 m. The risk of contact and droplet infection  
98 was small, and the possibility of aerosol infection was high. In this study, we evaluated  
99 the air change rate for each partition considering the same conditions under which the  
100 COVID-19 cluster occurred and improved conditions, in which ventilation routes were  
101 determined. Based on this analysis, we performed a quantitative risk assessment. The  
102 data from the sensor network were statistically analyzed using generalized linear  
103 mixed models (GLMMs) and dynamic time warping to verify the effect of ventilation  
104 improvement. Based on the results and on our previous investigations, we discussed  
105 the ventilation index that reduces the occurrence of COVID-19 clusters. The results  
106 suggest that the improvement in ACH is reasonable and consistent with the lack of  
107 subsequent reports of infections.

## 108 **Objectives**

109       The objectives of this research were to 1) demonstrate a method for evaluating  
110 and determining the state of air quality management in an office with a complex  
111 geometry using a CO<sub>2</sub> sensor network, and 2) verify the effectiveness of ventilation  
112 improvement measures.

## 113 **Materials and Methods**

114       This study was approved (approval number 21005) by the Ethics Committee on  
115 Experiments on Human Subjects of the University of Electro-Communications, Chofu,  
116 Tokyo, Japan.

117       The workplace where the cluster of infections occurred is a room where  
118 approximately 30 workers stayed for approximately one hour in the morning and one  
119 hour in the afternoon to prepare for the next work process. The workplace volume is  
120 approximately 2,640 m<sup>3</sup>, and it is divided by four partitions with a height of 1.8 m (Figure  
121 1), so there was no face-to-face interaction and the possibility of droplet infection was  
122 low. The distance between adjacent workers was approximately 2 m. Employees work  
123 alone and are not required to communicate with each other, so communication  
124 between workers was kept to a minimum. In the next work process, the employees  
125 work at individual workstations that are far apart, so there was no physical contact.

126       The workplace is located on the second floor of a three-story building that was

127 built in the 1950s and has been repeatedly remodeled. The main ventilation channels  
128 are the windows and doorways. During the cluster outbreak, although hand disinfection  
129 and masks were strictly enforced, only the doorway to another building was open for  
130 ventilation. This suggests that the risk of aerosol transmission was higher than that of  
131 contact or droplet transmission.

132 The COVID-19 cluster occurred in 2021. On weekdays, 52 employees work on  
133 this floor; 29 workers perform preparatory work for the next work step at the workbench  
134 in the red dotted frame in Figure 1. The other 23 managers and administrative staff  
135 work outside the red-dotted frame. One worker was the index case, and 10 of the 29  
136 workers followed to be positive for COVID-19 according to the polymerase chain  
137 reaction (PCR) testing. In addition, one manager and one office worker also tested  
138 positive. The 29 workers stayed in the room at once for approximately one hour in the  
139 morning. In the afternoon, the number of people simultaneously in the room was less  
140 than 29 at all times. Employees only worked together for approximately one hour in the  
141 morning and in the afternoon they did not interact as a group, so the opportunity for  
142 mutual infection was limited. The relatively high infection rate among the workers,  
143 despite the short time spent in the compartment, suggests that the infection spread  
144 due to causes confined to the compartment. A test of the difference in infection rates  
145 using a normal approximation by logit transformation of the binomial distribution

146 yielded a p-value of 0.02 for the null hypothesis of no difference in infection rates.

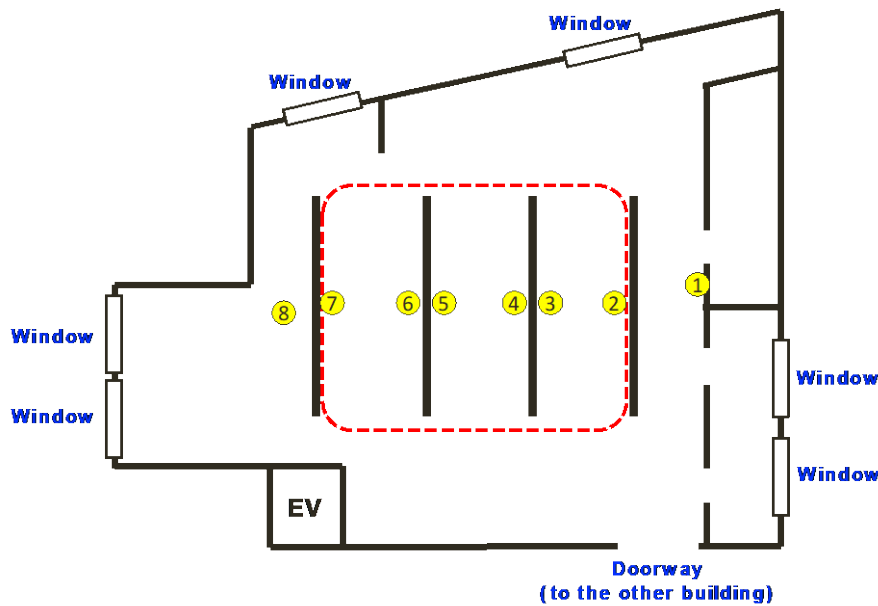

148 Figure 1. Layout of workplace and location of CO<sub>2</sub> sensors.

149

150 The compartmental indoor air ventilation was experimentally investigated. For that,  
151 the indoor airflow was observed using the CO<sub>2</sub> tracer. Compartmental transmission risk  
152 was indirectly evaluated using the CO<sub>2</sub> concentration as an alternative to the amount  
153 of exhaled air. In this study, dry ice was used as a CO<sub>2</sub> source, and eight CO<sub>2</sub> sensors  
154 were used to detect the changes in CO<sub>2</sub> concentrations in each compartment, as  
155 shown in Figure 1.

156 Non-dispersive infrared (NDIR) gas sensors were used as the CO<sub>2</sub> sensors. Eight  
157 TR-76Ui sensors (T&D Corporation, Japan) were placed on the desks within the  
158 compartments in which the employees had worked, as shown in Figure 1, in which the



159 numbers 1 to 8 indicate the locations of each sensor. The TR-76Ui sensor can detect  
160 CO<sub>2</sub> concentrations from 0 to 9,999 ppm, with an accuracy of  $\pm 50$  ppm ( $\pm 5\%$ ).

161 The experiment was conducted from 10:30 am to 12:30 pm on November 28, 2021.  
162 Dry ice was crushed on the floor to vaporize CO<sub>2</sub>, and the CO<sub>2</sub> concentration in the  
163 room was increased to approximately 3,000 ppm, which is sufficiently larger than the  
164 background level of outdoor CO<sub>2</sub>, with no ventilation. After that, the decrease in CO<sub>2</sub>  
165 concentration owing to the ventilation was measured by each sensor from 11:17 under  
166 ventilation Condition 1 (Table 1). After 35 min, the ventilation condition was changed  
167 to Condition 2 (Table 1), and the decrease in CO<sub>2</sub> concentration attributed to ventilation  
168 was continuously measured from 11:52. Condition 1 reproduced the situation at the  
169 time of the cluster occurrence, and Condition 2 represented an improved ventilation  
170 condition.

171

172 Table 1. Ventilation conditions of experiment.

|         | Condition 1    | Condition 2    |
|---------|----------------|----------------|
| Time    | 11:17 to 11:52 | 11:52 to 12:08 |
| Doorway | Open           | Open           |
| Window  | Closed         | Open           |

173

174 The air change per hour (ACH), which represents the ventilation around sensors,  
175 was estimated based on the time series change in CO<sub>2</sub> concentration under Condition  
176 1. A transient mass balance model was used to solve the CO<sub>2</sub> concentration around  
177 the sensors. The stable mass balance of well-mixed air can be described as:

$$V \frac{dC_t}{dt} = M + \lambda C_0 - \lambda C_t, \quad (1)$$

178 where  $C_t$  is the concentration of indoor pollutants at time  $t$ ,  $M$  is the number of  
179 pollutants generated,  $\lambda$  is the air ventilation rate, and  $C_0$  is the concentration in the  
180 absence of pollutant sources. As a general solution to the first-order linear ordinary  
181 differential equation shown in Equation (1), the concentration of pollutants at time  $i$   
182 can be obtained by the Seidel's equation<sup>12,13</sup>:

$$C_i = C_0 + (C_s - C_0)e^{-\frac{Q}{V}(i-s)} + \left(1 - e^{-\frac{Q}{V}(i-s)}\right) \frac{M}{Q}, \quad (2)$$

183 where  $Q$  is the outdoor air supply around the sensors [m<sup>3</sup>/h],  $V$  is the effective  
184 volume of the space around the sensors,  $s$  is the time at which the observation started,  
185 and  $\lambda = Q/V$  is the assumed air ventilation rate. When no pollutants are generated,  
186 i.e.  $M = 0$ , Equation (2) can be transformed into:

$$\ln \frac{C_i - C_0}{C_s - C_0} = -\frac{Q}{V}(i - s). \quad (3)$$

187 This equation suggests that a decrease in the normalized concentration of CO<sub>2</sub> with  
188 the ventilation time  $(i - s)$  [h] without pollutant generation corresponds to the ACH in  
189 the space, which was estimated using the linear model of  $Q/V$  [h] from Equation (3).

190 In this study, a 95% confidence interval for the estimated ACH was calculated along  
191 with the point estimates. The GLMM was used to statistically verify the improvement  
192 in ACH and its dependence on the position relative to ventilation points.

## 193 **Results**

194 The observed CO<sub>2</sub> behavior reflected well the characteristics of the workplace  
195 compartmental ventilation. Figure 2 shows a time series variation of the observed CO<sub>2</sub>  
196 concentration over the experimental period. After increasing the indoor CO<sub>2</sub>  
197 concentration from 2500 to 3000 ppm, which are significantly higher than the outdoor  
198 background concentration, the windows and entrances were set to ventilation  
199 Condition 1, and a gradual decrease in CO<sub>2</sub> concentration was observed in all locations  
200 of the room. Even after 34 min of ventilation, the CO<sub>2</sub> concentration only dropped to  
201 approximately 1500–2250 ppm. In addition, the variability in the CO<sub>2</sub> concentration  
202 also increased compared to that in the beginning of the observation period. Therefore,  
203 we changed the settings of the windows and entrances to ventilation Condition 2 to  
204 create a ventilation path, and observed the changes in CO<sub>2</sub> concentration for 16 min.  
205 A slight improvement in the ventilation rate was observed. In addition, the variability in  
206 the CO<sub>2</sub> concentration decreased slightly.

207

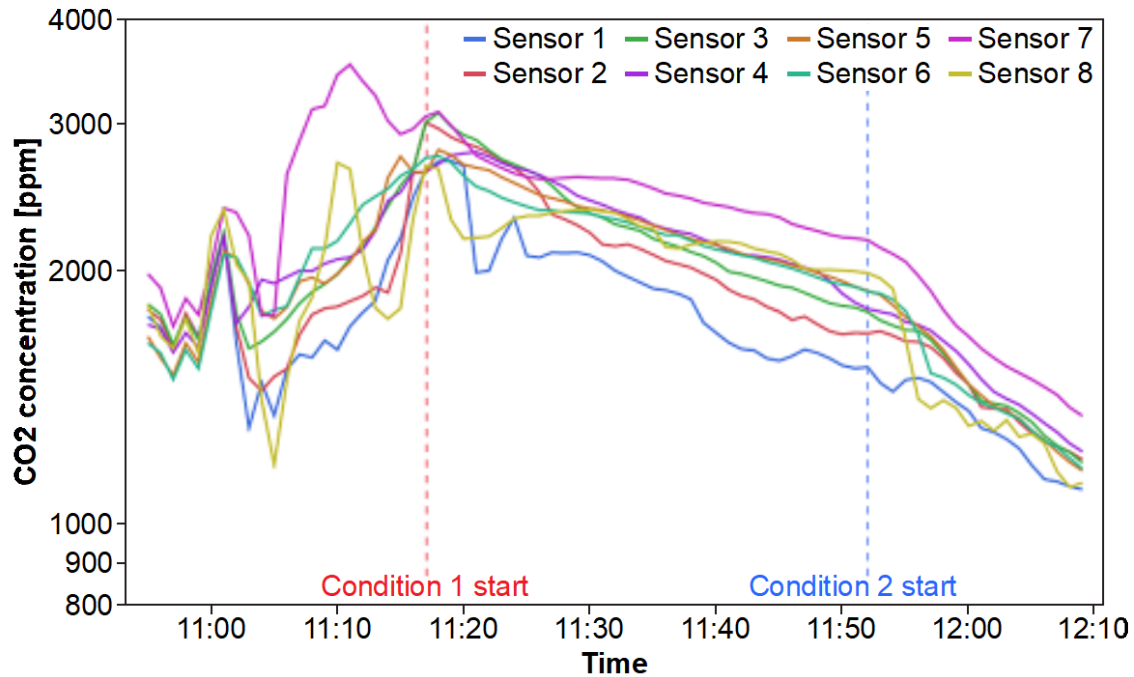

209 Figure 2. CO<sub>2</sub> concentration observed during experiments.

210

211 The changes in CO<sub>2</sub> concentration observed by the implemented experimental  
212 method fitted well Equation 2, so we can conclude that ACH was estimated with high  
213 accuracy. The normalized difference between the observed CO<sub>2</sub> concentration and the  
214 background concentration (assumed as 400 ppm) was plotted against the time of  
215 observation, as shown in Figure 3. There was a clear difference in the slope of the  
216 fitted line between ventilation Conditions 1 and 2. Under Condition 1, the plot was  
217 divided into two groups: sensors 1–3 and 4–8. This was attributed to the fluctuations  
218 immediately after the start of the observation periods. Therefore, it is reasonable to  
219 focus on the slope, that is, the number of compartmental ventilations, to quantify the

220 compartmental ventilation.

221

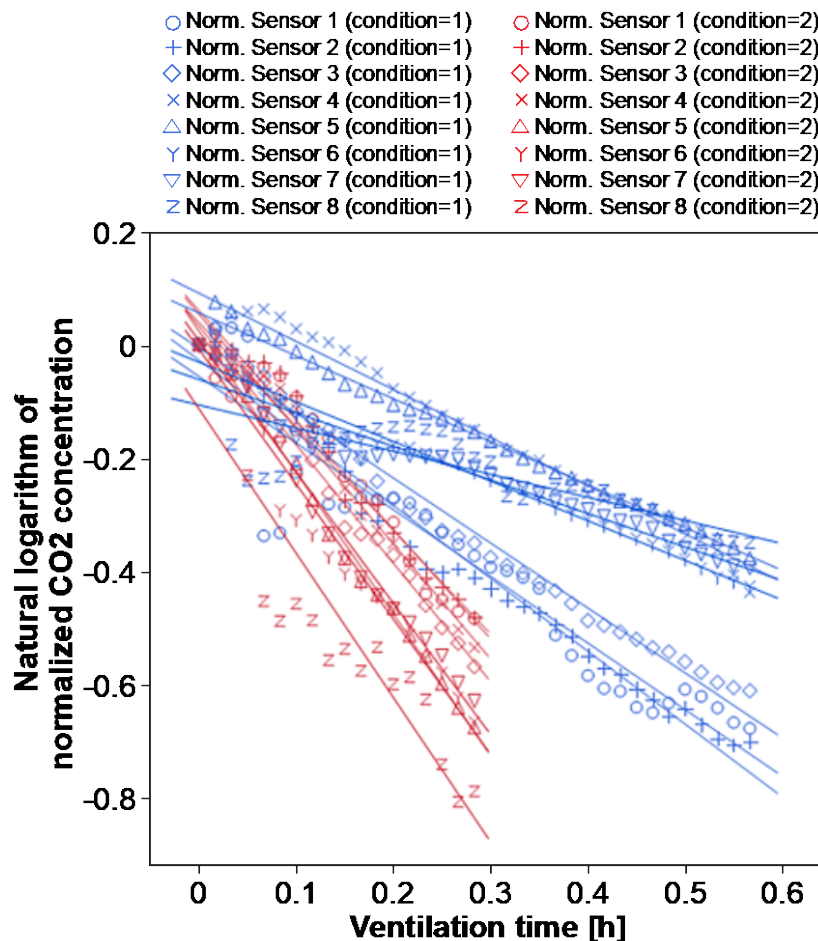

223 Figure 3. Analysis of compartmental air change per hour (ACH). Slopes of fitted lines

224 indicate ACH around sensors.

225

226 The ACH was estimated from the slope of the straight line in Figure 3. Although

227 Equation (2) is linear and without an intercept, the intercepts for each line cannot be

228 neglected because of the fluctuations in the first observations. Therefore, to ensure

229 estimation accuracy, the slope was estimated by assuming a linear equation with an

230 intercept. The ACHs estimated for each condition and sensor are shown in Table 2.

231 The statistical software JMP Pro Ver. 16 was used for the regression analysis.

232

233 Table 2. Estimated air change per hour (ACH) (95% confidence interval) for each

234 condition and sensor based on a linear regression analysis.

| Sensor | Estimated ACH [/h] |             |
|--------|--------------------|-------------|
|        | Condition 1        | Condition 2 |
| 1      | 1.178±0.139        | 1.835±0.224 |
| 2      | 1.287±0.063        | 1.934±0.157 |
| 3      | 1.148±0.048        | 2.093±0.129 |
| 4      | 0.851±0.049        | 2.032±0.130 |
| 5      | 0.759±0.027        | 2.503±0.088 |
| 6      | 0.700±0.035        | 2.386±0.227 |
| 7      | 0.592±0.058        | 2.322±0.130 |
| 8      | 0.408±0.098        | 2.551±0.524 |

235

236 Figure 4 shows the estimated ACH values. Under Condition 1 (the same during

237 the COVID-19 cluster outbreak), the ACH was low, and its maximum value was less

238 than 1.5 /h. Moreover, the ACH decreased as the distance from the doorway increased

239 because the doorway was the only route for the introduction of outside air. At the  
240 farthest point, near sensor 8, ACH was less than 0.5 /h. According to the Japanese  
241 Ministry of Health, Labor and Welfare (MHLW), in workplaces without proper ventilation  
242 structures, ventilation should be provided at least twice an hour by opening windows  
243 and doorways.<sup>8</sup> Furthermore, the probability of tuberculosis infection, for which  
244 airborne transmission is the established route of infection, is markedly reduced in  
245 workplaces with an ACH of 2 or higher.<sup>14-16</sup> The ACH at the time of the COVID-19  
246 cluster outbreak was probably much lower than this.

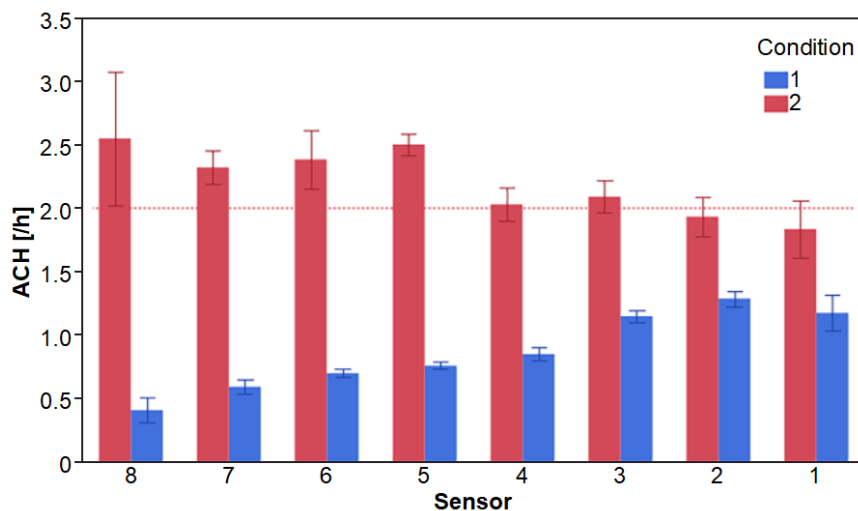

248 Figure 4. Estimated compartmental air change per hour (ACH) according to sensor.  
249 Error bars indicate a 95% confidence interval.

250

251 Under Condition 2, in which a window is opened to form a ventilation path, ACH  
252 was improved to approximately 2 /h. In addition, the ACH trend by location was

253 opposite to that under ventilation condition 1; its value increased as the distances from  
254 the doorway increased. That is, the amount of outside air introduced by opening the  
255 window was dominant under ventilation condition 2.

## 256 **Discussion**

257 In the Results section, we analyzed the data from each individual sensor and  
258 compared the results to identify the respective trends. However, it is also necessary to  
259 statistically test and estimate the trend of ACH variation based on time series data  
260 analysis to clarify if the variation was significant compared to the observation errors.

261 The GLMM<sup>17</sup> was used to analyze the effects of experimental conditions on  
262 ventilation and the differences and trends in ACH attributed to sensor location, that is,  
263 the inhibitory effects of inappropriate partitions on ventilation. The GLMM model is a  
264 mixed effect model in which the ventilation time and interaction between ventilation  
265 time and sensor location are fixed effects, and the sensor location is a random effect.  
266 The objective variable is the ratio of the increase in CO<sub>2</sub> concentration from the  
267 background to that at the beginning of the observation, and the model presented a  
268 natural logarithm as the link function.

269 The GLMM analysis was conducted using the statistical software JMP Pro Ver. 16  
270 for Conditions 1 and 2. In both cases, the GLMM explained the observed data well,  
271 with a coefficient of determination  $R^2 > 0.96$ . The results of the fixed-effects tests are



272 listed in Table 3. The estimated covariance parameters of the variational effects are  
 273 shown in Table 4. The results shown in Table 3 indicate that the interactions between  
 274 ventilation time and sensor location were highly significant. Moreover, the decrease in  
 275 CO<sub>2</sub> concentration with ventilation time for Conditions 1 and 2 was also highly  
 276 significant. The results shown in Table 4 also indicate that the random effects were not  
 277 significant on their own for both Conditions 1 and 2. These results suggest that  
 278 ventilation was impeded by the partitions installed in the room, and that the ACH  
 279 fluctuation depends on the position in the partitions and air flow root.

280

281 Table 3. Results of the test of fixed effects for each ventilation condition.

| Ventilation condition | Factor                                                    | Number of parameters | DOF <sup>†</sup> of numerator | DOF <sup>†</sup> of denominator | F-value   | p-value |
|-----------------------|-----------------------------------------------------------|----------------------|-------------------------------|---------------------------------|-----------|---------|
| 1                     | Ventilation time                                          | 1                    | 1                             | 264                             | 4296.4964 | <0.0001 |
|                       | Interaction of<br>Ventilation time and<br>Sensor location | 7                    | 7                             | 264                             | 69.3716   | <0.0001 |
| 2                     | Ventilation time                                          | 1                    | 1                             | 128                             | 2610.0041 | <0.0001 |
|                       | Interaction of                                            | 7                    | 7                             | 128                             | 4.8542    | <0.0001 |

|  |                                         |  |  |  |  |  |
|--|-----------------------------------------|--|--|--|--|--|
|  | Ventilation time and<br>Sensor location |  |  |  |  |  |
|--|-----------------------------------------|--|--|--|--|--|

282 †DoF: degrees of freedom.

283

284 Table 4. Covariance parameter estimates of random effects according to ventilation

285 condition.

| Ventilation condition | Variance components | Estimate  | Standard error | 95% Lower limit | 95% Upper limit | Wald p-value |
|-----------------------|---------------------|-----------|----------------|-----------------|-----------------|--------------|
| 1                     | Sensor              | 0.0092261 | 0.0049527      | -0.000481       | 0.0189332       | 0.0625       |
|                       | Residual error      | 0.0013827 | 0.0001204      | 0.0011742       | 0.0016526       |              |
|                       | Sum                 | 0.0106089 | 0.0049541      | 0.0050479       | 0.0348439       |              |
| 2                     | Sensor              | 0.0075253 | 0.0040821      | -0.000476       | 0.0155261       | 0.0653       |
|                       | Residual error      | 0.0020094 | 0.0002512      | 0.0015955       | 0.0026093       |              |
|                       | Sum                 | 0.0095347 | 0.004089       | 0.0047692       | 0.0276991       |              |

286

287 The maximum likelihood estimates of ACH for each condition and sensor are listed

288 in Table 5. They were in good agreement with the results of the individual linear

289 regressions, thereby supporting the validity of the discussion obtained from Tables 3

290 and 4.

291

292

293

294 Table 5. Air change per hour (ACH) (95% confidence level) according to ventilation

295 conditions and sensors estimated by a generalized linear mixed model.

| Sensor | Estimated ACH [h] |             |
|--------|-------------------|-------------|
|        | Condition 1       | Condition 2 |
| 1      | 1.178±0.073       | 1.835±0.239 |
| 2      | 1.287±0.073       | 1.934±0.239 |
| 3      | 1.148±0.073       | 2.093±0.239 |
| 4      | 0.851±0.073       | 2.032±0.239 |
| 5      | 0.759±0.073       | 2.503±0.239 |
| 6      | 0.701±0.073       | 2.386±0.239 |
| 7      | 0.592±0.073       | 2.322±0.239 |
| 8      | 0.408±0.073       | 2.551±0.239 |

296

297 Figure 5 shows the fitting results of the estimated GLMM to the observed values.

298 The estimated GLMMs explain the observed values well, which indicates that the ACH

299 estimates and their variations were reasonable. However, the observed values for

300 sensors 1 and 8, which were located at the outermost periphery of the room, showed  
301 relatively large errors compared to the other sensors. This might have occurred  
302 because the amount of ventilation introduced from outside air was affected by the  
303 weather, wind speed, and wind direction outside the room. Conversely, the ventilation  
304 in the inner partitions was less sensitive to the outdoor environment.  
305

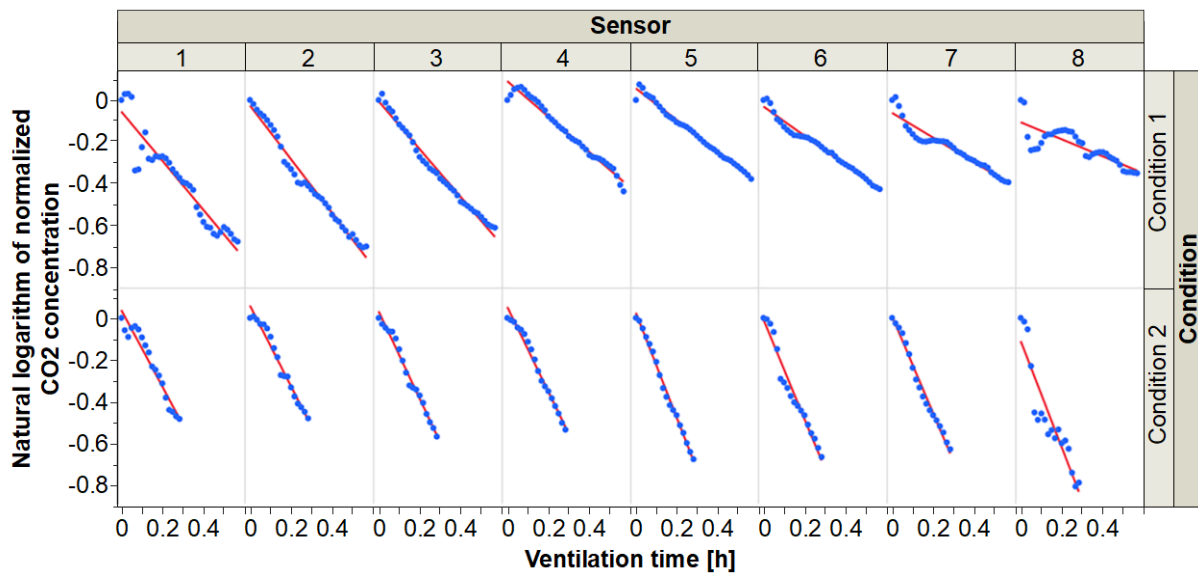

307 Figure 5. Fittings of estimated generalized linear mixed models to observed CO<sub>2</sub>  
308 concentrations.

309  
310 The characteristics of the ventilation distribution were investigated based on the  
311 similarity of the ACH patterns at each sensor location. The dynamic time warping  
312 (DTW)<sup>18,19</sup> method was used to calculate the DTW distance of the ventilation patterns

313 measured over time. DTW is an algorithm for measuring the similarity between two  
314 time-series data, which may vary in speed. Similarities in CO<sub>2</sub> variation can be detected  
315 using DTW, even if there are accelerations and decelerations during an observation.  
316 To calculate the DTW distance, we used the statistical language R package "dtw" Ver.  
317 1.22-3.

318 The matrix of the DTW distance between each sensor data is shown in Figure 6.  
319 The DTW matrices were calculated for each ventilation condition. They were colored  
320 according to the distance, with a relatively high pattern similarity colored in green and  
321 low pattern similarity colored in red in a stepwise manner. The diagonal component  
322 was excluded because it refers to itself. Because of the difference in the number of  
323 data, the absolute values of the DTW distance between Conditions 1 and 2 could not  
324 be compared. Therefore, the study focused on the difference in room similarity  
325 distribution.

326

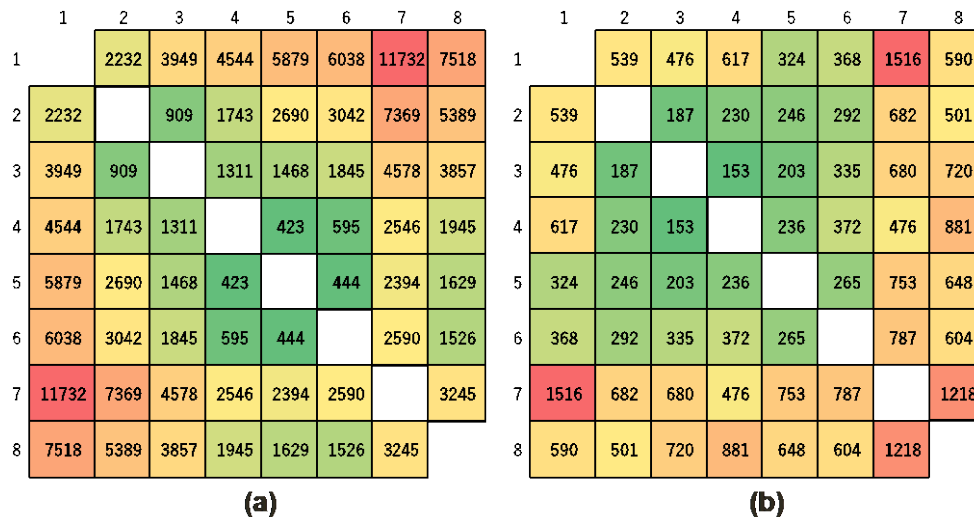

328 Figure 6. DTW distance matrices for each ventilation condition. (a) Ventilation condition  
 329 1. (b) Ventilation condition 2.

330

331 Figure 6 shows that sensors 1, 7, and 8, which are near the edge of the room,  
 332 presented less similarity in behavior with the sensors near the center of the room. The  
 333 results suggest that the ventilation patterns of neighboring locations were similar. The  
 334 range of pattern similarity near the center of the room was wider under Condition 2  
 335 than under Condition 1. These results suggest that although opening the windows in  
 336 ventilation Condition 2 improved the ventilation of the entire workplace, the ventilation  
 337 effect was less effective in reaching the center of the room because of the partitions.  
 338 Therefore, it was speculated that ventilation can be increased by improving the airflow  
 339 along the partitioned areas.

340 In summary, for aerosol infection control, which should be conducted in parallel

341 with measures against contact and droplet transmission, the maximum height of  
342 partitions should be strictly controlled, and they should be installed at a height and  
343 orientation that do not interfere with ventilation. Measurement using sensor networks  
344 is effective in detecting such a ventilation bias. In addition, the observed bias of CO<sub>2</sub> is  
345 more complex in rooms with larger sizes, complex geometries, and various uses,<sup>2,11</sup>  
346 and this study agrees with previously reported results.

347 Although there is still a possibility of confounding variables owing to the relatively  
348 small number of infections in Japan since October 2021, the fact that no infections  
349 have been confirmed since the adoption of improved ventilation Condition 2 and the  
350 results of our previous study<sup>2</sup> indicate that the outbreaks of the infection clusters share  
351 the feature of a ACH of less than 2 /h. In addition, where the ACH was improved to 2  
352 or more /h, no evidence of a second infection cluster has been identified.

353 This index for ACH is consistent with the results of previous studies on  
354 tuberculosis and is considered highly valid.<sup>14-16</sup> In large workplaces with complex  
355 layouts and partitions, ventilation conditions become complex, so local monitoring and  
356 quantitative evaluation using sensor networks, as shown in this study, are effective.

357 In future studies, real-time data from the CO<sub>2</sub> sensor network should be analyzed  
358 to identify compartments with increased risk to issue alerts at appropriate times. This  
359 would require the combination of CO<sub>2</sub> concentration and other sensor data such as

360 temperature, humidity, illumination, barometric pressure, and human detection. The  
361 authors have already reported a method of applying topological data analysis to  
362 multidimensional time-series data from many sensors.<sup>11</sup> In the future, we hope to  
363 develop a method for the diagnosing of anomalies by combining data integration with  
364 machine learning and deep learning.

## 365 **Conclusions**

366 We measured ACH using a CO<sub>2</sub> sensor network in a workplace where a cluster of  
367 COVID-19 infections occurred, and investigated the adverse effects of inappropriate  
368 partitions and the details of the ventilation improvement effect. A statistical analysis  
369 using GLMM showed that the ACH in the room was biased along to the position in the  
370 partitions and air flow root. In addition, by examining the similarity of ventilation patterns  
371 using DTW, the distribution of ventilation patterns between the partition and the effect  
372 of ventilation conditions were evaluated. The results indicated that a ACH of less than  
373 2 /h was favorable for the formation of the COVID-10 clusters in this facility.

## 374 **References**

- 375 [1] Li Y, Qian H, Hang J, et al. Probable airborne transmission of SARS-CoV-2 in a  
376 poorly ventilated restaurant. *Building and Environment*. 2021;196:107788. doi:  
377 <https://doi.org/10.1016/j.buildenv.2021.107788>
- 378 [2] Ishigaki Y, Kawauchi Y, Yokogawa S, Saito A, Kitamura H, Moritake T. Experimental  
379 investigation to verify if excessive plastic sheeting shielding produce micro clusters  
380 of SARS-CoV-2. *medRxiv*. 2021;21257321. doi:  
381 <https://doi.org/10.1101/2021.05.22.21257321>
- 382 [3] Peng Z, Jimenez JL. Exhaled CO<sub>2</sub> as a COVID-19 infection risk proxy for different



- 383 indoor environments and activities. *Environmental Science and Technology Letters*.  
384 2021;8:392-397. doi: <https://doi.org/10.1021/acs.estlett.1c00183>
- 385 [4] Schade W, Reimer V, Seipenbusch M, Willer U. Experimental investigation of  
386 aerosol and CO<sub>2</sub> dispersion for evaluation of COVID-19 infection risk in a concert  
387 hall. *International Journal of Environmental Research and Public Health*.  
388 2021;18:3037. doi: <https://www.mdpi.com/1660-4601/18/6/3037>
- 389 [5] Poydenot F, Abdourahamane I, Caplain E, et al. Risk assessment for long and  
390 short range airborne transmission of SARS-CoV-2, indoors and outdoors, using  
391 carbon dioxide measurements. *medRxiv*. 2021;21256352. doi:  
392 <https://doi.org/10.1101/2021.05.04.21256352>
- 393 [6] Schibuola L, Tambani C. High energy efficiency ventilation to limit COVID-19  
394 contagion in school environments. *Energy and Buildings*. 2021;240:110882. doi:  
395 <https://doi.org/10.1016/j.enbuild.2021.110882>
- 396 [7] Hou D, Katal A, Wang L. Bayesian calibration of using CO<sub>2</sub> sensors to assess  
397 ventilation conditions and associated COVID-19 airborne aerosol transmission risk  
398 in schools. *medRxiv*. 2021;21250791. doi:  
399 <https://doi.org/10.1101/2021.01.29.21250791>
- 400 [8] Ministry of Health, Labour and Welfare, Japan (MHLW). Ventilation to Improve  
401 "Poorly Ventilated Enclosed Spaces" in Commercial Facilities and others. (*In*  
402 *Japanese*: Shougyou shisetsu nado ni okeru "Kanki no warui misshuu kuukan" wo  
403 kaizen surutameno kanki ni tsuite).  
404 <https://www.mhlw.go.jp/content/10900000/000616069.pdf> Accessed January 8,  
405 2022.
- 406 [9] Centers for Disease Control and Prevention, USA. Ventilation in Buildings.  
407 <https://www.cdc.gov/coronavirus/2019-ncov/community/ventilation.html> Accessed  
408 January 8, 2022.
- 409 [10] Shewhart WA. *Statistical Method from the Viewpoint of Quality Control*, 1939.  
410 ISBN 0-486-65232-7.
- 411 [11] Endo S, Yokogawa S. Analysis of the trends between indoor carbon dioxide  
412 concentration and plug-level electricity usage through topological data analysis.  
413 *IEEE Sensors Journal*. Early Access. doi: 10.1109/JSEN.2021.3130570
- 414 [12] Tarumi H. *Text of architecture environment: design of thermal and air*, Shoin I, 2007.  
415 *In Japanese*. ISBN: 9784753017430
- 416 [13] Ito S, Nishi H. Estimation of the number of people under controlled ventilation using  
417 a CO<sub>2</sub> concentration sensor. *IECON 2012*. 2012. doi:  
418 10.1109/IECON.2012.6388997
- 419 [14] Menzies D, Fanning A, Yuan L, FitzGerald JM. Hospital ventilation and risk for  
420 tuberculous infection in Canadian health care workers. *Annals of Internal Medicine*.

- 421 2000;133:779-789. doi: [https://doi.org/10.7326/0003-4819-133-10-200011210-](https://doi.org/10.7326/0003-4819-133-10-200011210-00010)  
422 00010
- 423 [15]Bloch AB, Orenstein WA, Ewing WM, et al. Measles outbreak in a pediatric  
424 practice: Airborne transmission in an office setting. *Pediatrics*. 1985;75:676-683.  
425 doi: <https://doi.org/10.1542/peds.75.4.676>
- 426 [16]Toyota M. Study on environmental factors of tuberculosis outbreak in junior high  
427 schools. *Kekkaku*. 2003;78:11-16. *In Japanese*. doi:  
428 <https://doi.org/10.11400/kekaku1923.78.733>
- 429 [17]Dobson AJ, Barnett AG. *An Introduction to Generalized Linear Models*, Chapman  
430 and Hall/CRC, 4th ed., 2018.
- 431 [18]Keogh E, Ratanamahatana CA. Exact index of dynamic time warping. *Knowledge*  
432 *and Information Systems*. 2005;7:358-386. doi: [https://doi.org/10.1007/s10115-](https://doi.org/10.1007/s10115-004-0154-9)  
433 004-0154-9
- 434 [19]Giorgino T. Computing and visualizing dynamic time warping alignments in R: The  
435 dtw package. *Journal of Statistical Software*. 2009;31:1-24. doi:  
436 <https://doi.org/10.18637/jss.v031.i07>
